# Supplementary material
Source: PubMed Central journal article supplement (PMC6159565)

Supplementary Figure 1. Number of HAV (A) and HEV outbreaks diagnosed by VRDLs, 2014-17

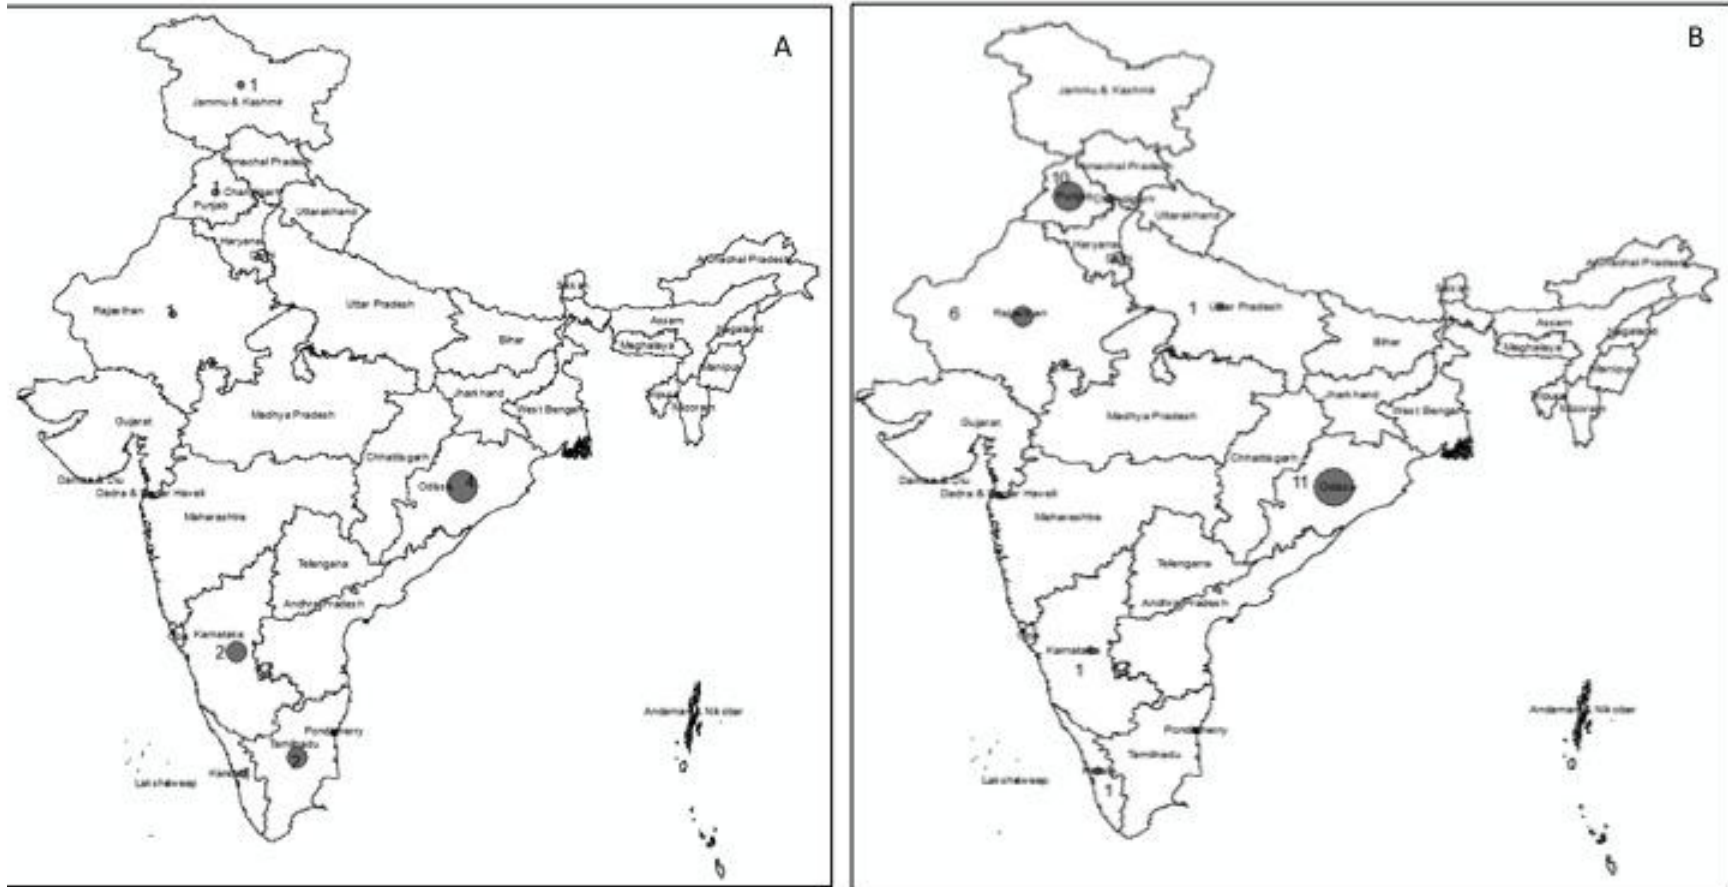

Supplement: tpmd180232.SD1.pdf [file tpmd180232.SD1.pdf]
